# Supplementary material for: Large variation in anti-SARS-CoV-2 antibody prevalence among essential workers in Geneva, Switzerland
Source: PubMed Central journal article supplement (PMC8187639; doi:10.1038/s41467-021-23796-4), 2021-06-08
Supplement: 41467_2021_23796_MOESM3_ESM.pdf [file 41467_2021_23796_MOESM3_ESM.pdf]

## Reporting Summary

Nature Research wishes to improve the reproducibility of the work that we publish. This form provides structure for consistency and transparency in reporting. For further information on Nature Research policies, see our [Editorial Policies](#) and the [Editorial Policy Checklist](#).

### Statistics

For all statistical analyses, confirm that the following items are present in the figure legend, table legend, main text, or Methods section.

n/a Confirmed

- The exact sample size ( $n$ ) for each experimental group/condition, given as a discrete number and unit of measurement
- A statement on whether measurements were taken from distinct samples or whether the same sample was measured repeatedly
- The statistical test(s) used AND whether they are one- or two-sided  
*Only common tests should be described solely by name; describe more complex techniques in the Methods section.*
- A description of all covariates tested
- A description of any assumptions or corrections, such as tests of normality and adjustment for multiple comparisons
- A full description of the statistical parameters including central tendency (e.g. means) or other basic estimates (e.g. regression coefficient) AND variation (e.g. standard deviation) or associated estimates of uncertainty (e.g. confidence intervals)
- For null hypothesis testing, the test statistic (e.g.  $F$ ,  $t$ ,  $r$ ) with confidence intervals, effect sizes, degrees of freedom and  $P$  value noted  
*Give  $P$  values as exact values whenever suitable.*
- For Bayesian analysis, information on the choice of priors and Markov chain Monte Carlo settings
- For hierarchical and complex designs, identification of the appropriate level for tests and full reporting of outcomes
- Estimates of effect sizes (e.g. Cohen's  $d$ , Pearson's  $r$ ), indicating how they were calculated

*Our web collection on [statistics for biologists](#) contains articles on many of the points above.*

### Software and code

Policy information about [availability of computer code](#)

Data collection

Data analysis

For manuscripts utilizing custom algorithms or software that are central to the research but not yet described in published literature, software must be made available to editors and reviewers. We strongly encourage code deposition in a community repository (e.g. GitHub). See the Nature Research [guidelines for submitting code & software](#) for further information.

### Data

Policy information about [availability of data](#)

All manuscripts must include a [data availability statement](#). This statement should provide the following information, where applicable:

- Accession codes, unique identifiers, or web links for publicly available datasets
- A list of figures that have associated raw data
- A description of any restrictions on data availability

Due to cantonal regulations, our data are not immediately available. However, our data can be made available to share upon submission of a data request application to the investigators board via the corresponding author. Virologically-confirmed SARS-CoV-2 infection data from the Canton of Geneva: <https://www.ge.ch/document/covid-19-situation-epidemiologique-geneve>.

## Field-specific reporting

Please select the one below that is the best fit for your research. If you are not sure, read the appropriate sections before making your selection.

Life sciences       Behavioural & social sciences       Ecological, evolutionary & environmental sciences

For a reference copy of the document with all sections, see [nature.com/documents/nr-reporting-summary-flat.pdf](https://www.nature.com/documents/nr-reporting-summary-flat.pdf)

## Life sciences study design

All studies must disclose on these points even when the disclosure is negative.

|                 |                                                                                                                                                                                                                                       |
|-----------------|---------------------------------------------------------------------------------------------------------------------------------------------------------------------------------------------------------------------------------------|
| Sample size     | No sample-size calculation was done. All workers that were mobilized during the lockdown and who worked in the companies/institutions included in a list we created were invited to participate.                                      |
| Data exclusions | No data were excluded.                                                                                                                                                                                                                |
| Replication     | Due to the large amount of samples to be processed, all testing using the Euroimmun ELISA were performed only once in the study. Accordingly, relative risk analyses were adjusted for test performance, as described in the methods. |
| Randomization   | This is an observational study without an intervention, so randomization is not applicable.                                                                                                                                           |
| Blinding        | This is an observational study without an intervention, so blinding is not applicable.                                                                                                                                                |

## Reporting for specific materials, systems and methods

We require information from authors about some types of materials, experimental systems and methods used in many studies. Here, indicate whether each material, system or method listed is relevant to your study. If you are not sure if a list item applies to your research, read the appropriate section before selecting a response.

### Materials & experimental systems

| n/a                                 | Involvement in the study                                        |
|-------------------------------------|-----------------------------------------------------------------|
| <input type="checkbox"/>            | <input checked="" type="checkbox"/> Antibodies                  |
| <input checked="" type="checkbox"/> | <input type="checkbox"/> Eukaryotic cell lines                  |
| <input checked="" type="checkbox"/> | <input type="checkbox"/> Palaeontology and archaeology          |
| <input checked="" type="checkbox"/> | <input type="checkbox"/> Animals and other organisms            |
| <input type="checkbox"/>            | <input checked="" type="checkbox"/> Human research participants |
| <input checked="" type="checkbox"/> | <input type="checkbox"/> Clinical data                          |
| <input checked="" type="checkbox"/> | <input type="checkbox"/> Dual use research of concern           |

### Methods

| n/a                                 | Involvement in the study                        |
|-------------------------------------|-------------------------------------------------|
| <input checked="" type="checkbox"/> | <input type="checkbox"/> ChIP-seq               |
| <input checked="" type="checkbox"/> | <input type="checkbox"/> Flow cytometry         |
| <input checked="" type="checkbox"/> | <input type="checkbox"/> MRI-based neuroimaging |

## Antibodies

|                 |                                                                                                                                                                                                                                                                |
|-----------------|----------------------------------------------------------------------------------------------------------------------------------------------------------------------------------------------------------------------------------------------------------------|
| Antibodies used | We assessed anti-SARS-CoV-2 IgG antibodies using a commercially available ELISA (Euroimmun; Lübeck, Germany #EI 2606-9601 G) targeting the S1 domain of the virus spike protein, using the manufacturer's recommended cut-off of $\geq 1.1$ for seropositivity |
| Validation      | Meyer, B. et al. Validation of a commercially available SARS-CoV-2 serological immunoassay. Clin. Microbiol. Infect. 26, 1386–1394 (2020).                                                                                                                     |

## Human research participants

Policy information about [studies involving human research participants](#)

Population characteristics

Working-age adults who were mobilized during the Spring 2020 lockdown in Switzerland: 10,513 participants, of which 55.6% women, and with a mean age [standard deviation]: 43.0 years [10.7].

Recruitment

We selected public and private companies and institutions that were potentially mobilized (see Supplementary Table 1 for further selection and recruitment information). Participating facilities in turn invited their employees to participate on a voluntary basis. All participants gave written informed consent, completed a questionnaire and provided a venous blood sample. While the sample was not randomly selected from the general population, the overall seropositivity rate reflected that of the general population. Participation rate was around 50% for most sectors, also reflecting participation rates in population-based surveys. Thus, self-selection and participation bias may be present but likely no differently than in population-based representative samples.

Ethics oversight

The Cantonal Research Ethics Commission of Geneva, Switzerland, approved the study protocol (project number 2020-00881).

Note that full information on the approval of the study protocol must also be provided in the manuscript.
